# Supplementary material for: EFG1 Mutations, Phenotypic Switching, and Colonization by Clinical a/α Strains of Candida albicans
Source: PubMed Central journal article supplement (PMC7002308; doi:10.1128/msphere.00795-19), 2020-02-05

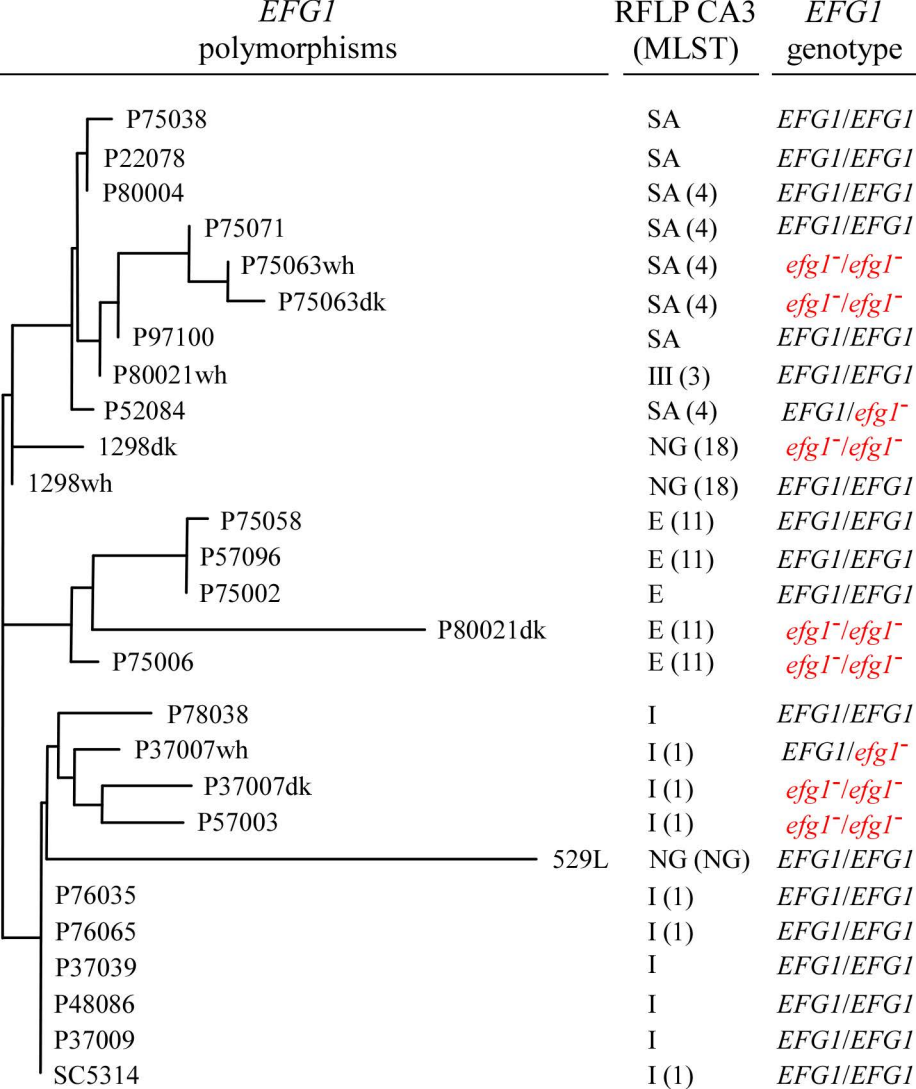

Supplement: mSphere.00795-19-sf001.pdf [file mSphere.00795-19-sf001.pdf]
